# Supplementary material for: Sex change in scallop Patinopecten yessoensis: response to population composition?
Source: PeerJ. 2018 Jul 12;6:e5240. doi: 10.7717/peerj.5240 (PMC6046201; doi:10.7717/peerj.5240)
Supplement: Data S1 [file peerj-06-5240-s001.xlsx]

## Sheet: Лист1
			shell		Shell	height	at the	age
№	sex	age	height	1	2	3	4	5
Anna Bay, 1988
1	f	3	117	53.9	100.5	118.5
2	f	3	122	44	102.5	123
3	m	3	114	50	95	116
4	f	3	133	59	110	126
5	m	3	120	58	101.5	123
6	m	4	130	47.5	91.5	115	129.5
7	m	5	138	54.5	96	120	131	138
8	f	4	131	59	97	121	132
9	f	5	136	53	92.5	117.5	128	134
10	f	4	142	55.5	100	129	143
11	m	4	141	56.2	104.2	129	140
12	f	4	142	56	98	123.5	140
13	f	4	138	54	94.5	123.5	138
14	f	4	140	53	97	121.5	138.5
15	m	5	130	56.3	97.5	118	124	130
16	f	2	81	52.5	82
17	m	2	73	44.5	73
18	f	2	83	55.5	83
19	m	2	80	50	80
20	f	2	88	59.5	88
21	m	2	82	51	82
22	m	2	77	50	76.1
23	f	2	70	45.5	70.2
24	m	2	85	59	85.2
25	f	2	82	53	82.5
26	f	2	81	52.5	80.5
27	m	2	73	45.5	74
28	m	2	88	57.5	87
29	m	2	81	50	80
30	m	2	83	56	83
31	m	2	80	51.5	81
32	m	2	83	54	83
33	m	2	73	46.5	73.2
34	f	2	81	53.5	81
35	m	2	80	48.5	80
36	f	2	75	48	76
37	f	2	79	48	79
38	m	2	75	48	74.5
39	m	2	89	58	87.2
40	m	2	84	54	82
41	m	2	82	53	81.5
42	f	2	77	48	76
43	m	2	83	55	82.5
44	m	2	91	60	91.5
45	m	2	81	53.5	80.5
46	m	2	94	58.5	93.5
47	f	2	85	53.5	85
48	m	2	68	37	69
49	f	6	156	57.5	98.7	121.5	138	146
50	f	7	153	51.5	95	119	134	141.5
51	f	7	160	48	93.7	117	131.5	137.8
52	f	7	157	53.5	96.5	118.5	131.5	140
53	f	4	136	54	98.5	124	136
54	m	4	136.5	53.5	97.2	122.2	135.2
55	m	3	119	48.5	91.5	120.2
56	f	2	90	61.5	91
57	m	2	78	50.5	78.5
58	m	2	73.2	49	74
59	m	2	73	48	73
mean				52.4729	86.9186	121.223	134.387	138.186
Pervaya Rechka River Estuary, 2016
1	m	4	121	30	70	107	120
2	m	4	124	40	75	103	122
3	f	4	122	30	66	98	120
4	f	4	123	38	80	111	123
5	f	4	123	44	82	110	122
6	f	4	120	31	65	92	118
7	m	4	125	40	76	106	123
8	f	4	116	42	77	106	114
9	f	4	116	32	70	103	115
10	f	3	110	43	88	107
11	f	3	100	40	75	98
12	m	3	105	34	70	100
13	f	3	111	46	88	110
14	m	2	103	53	98
15	m	2	102	56	97
16	f	2	103	54	99
17	m	2	101	50	99
18	f	3	104	38	80	101
19	m	3	109	39	74	107
20	m	2	95	52	88
21	m	2	94	49	87
22	m	4	123	36	73	105	121
23	f	5	129	44	87	113	124	128
24	f	4	125	38	82	107	121
25	m	4	120	30	62	95	117
26	f	4	127	40	85	117	125
27	f	4	121	40	76	108	118
28	f	4	122	45	77	107	120
29	m	4	128	39	78	107	127
30	m	4	125	37	75	106	122
31	f	3	105	38	72	101
32	m	3	102	35	72	99
33	f	4	118	32	68	101	117
34	f	3	107	36	65	104
35	m	2	102	53	99
36	f	3	115	40	85	112
37	m	3	99	34	72	96
38	f	2	84	30	82
39	f	2	100	50	98
40	m	3	95	35	70	90
41	m	2	91	50	87
42	m	2	100	45	97
43	m	2	86	41	78
44	m	2	70	37	64
mean				40.5909	79.7273	104.097	120.474
At Cape Shkota , 1979
1	m	5	136	52	93	120	129	133
2	f	7	147	48	95	120	135
3	f	5	145	50	98	122	133	141
4	f	5	127	45	82	104	118	124
5	m	2	89	50	88
6	m	2	83	47	83
7	m	2	73	39	73
8	m	2	83	43	82
9	f	7	145	47	95
10	f	6	138	47	85	111	129	134
11	m	10	150	54	97
12	f	4	137	47	99	124	135
13	f	7	145	47	93	117
14	m	2	87	42	86
15	m	2	83	46	81
16	m	2	80	41	79
17	m	2	92	51	89
18	m	2	81	43	80
19	f	2	80	39	78
20	m	2	79	41	79
21	f	6	135	44	82	110	125	133
22	m	5	134	48	88	110	125	132
23	f	7	141	45	89	113	124	130
24	f	5	135	58	93	114	127.5	133
25	m	7	139	51	95	117	127	132
26	f	6	139	44	83	103	124	130
27	f	8	157	64	110	128	140	146
28	m	8	155	57	102	126	135	142
29	m	7	143	51	99	116	127	135
30	f	7	142	60	100	115	126	134
31	f	7	133	53	95	113	120	125
32	m	9	154	63	98
33	f	3	123	58	103	122
34	f	3	115	54	95	113
35	m	2	81	44	79
36	m	2	80	38	78
37	f	8	171	35	87	127	145
mean				48.2703	89.4865	116.429	129.139	133.6
Srednyaya Bay, 1988
1	m	8	147
2	f	11	151.5
3	f	10	163
4	f	8	145					130
5	m	10	160
6	f	6	125					120
7	f	8	135
8	m	11	154.5
9	f	4	111				111
10	m	3	98			98
11	f	4	119				119
12	m	3	105			105
13	m	3	98			98
14	m	2	81		81
15	f	4	116				116
16	f	4	124				124
17	f	4	116				116
18	f	3	101.5			101.5
19	m	4	115				115
20	m	3	92			92
21	m	6	130					123
22	m	7	141					129
23	m	7	144					133
24	f	9	170
25	m	10	157
26	f	10	150
27	m	9	165
28	f	10	159
29	m	3	85	42.5	79	82
30	m	3	76	37.5	67	76
31	m	3	75.5	30	61	75
32	m	3	72.5	35	61.5	70
33	m	3	87.5	45	75.5	86.1
34	f	3	79	36	67	75
35	m	3	88.5	39	71	81
36	m	3	82.5	39	71	82
37	f	3	88.5	40	70	86
38	f	3	86	40	73	82
39	m	3	82	42.2	70	81
40	m	3	79	35	65	79
41	m	4	107.5	28.5	73.5	96.5	115
42	f	4	101	31.5	68	90	97.5
43	m	4	101.5	29	65	90	98.5
44	m	4	109.5	41	80	100.5	117.5
45	f	6	132	38	77	102	115	122
46	f	4	115	45.2	84	106	112.5
47	m	4	100		63.5	89	97
48	m	4	113	34	77	100	111
49	m	4	105	35	71.5	93	102.5
50	m	3	102	56.5	88	100
51	f	4	112.5	38	78.5	101	110
52	f	4	126	36.5	88	111	122.5
53	m	8	145
54	f	6	136.5	36	74	100	118	128
55	m	10	157.5
56	f	10	171
57	m	12	158
58	f	8	141.5	46	88
59	m	5	139	38	82	111.5	126	133.5
60	m	7	153	43	97.5	124	133	139
61	f	9	153	33	78.5	116	136	142
62	m	5	143	35.5	83	116	133.5	140
63	m	4	121.5	47	90	114	121.5
64	f	7	153					141
65	m	8	152.5	29.5	93.5	102
66	f	3	116.5	57	94	112
67	m	4	119.5	55	100	116.5	121.5
68	m	3	125.5	55.5	103.5	119
69	m	3	119.5	63.5	101.5	116
70	m	6	122	46	88	108	114	119
71	m	7	135	31.5	70	103	118	126
72	f	4	127.5	41	78	111	122.5
73	m	3	114.5	55	97.5	111
mean				40.6897	79.1463	97.9227	116.444	130.393
Pervaya Rechka River Estuary, 1994
1	m	5	119	29	63	94	110	119
2	f	4	124	30	72	106	124
3	f	3	116	63	98	116
4	f	4	121	24	63	100	121
5	f	6	123	34	67	91	112	119
6	m	6	116	37	71	90	99	107
7	m	8	133	39	74	93	105	117
8	f	4	125	38	86	109	125
9	m	6	127	35	70	87	109	120
10	m	5	113	40	69	83	105	113
11	f	4	114	18	64	98	114
12	f	6	128	43	77	95	114	121
13	f	5	120	37	71	92	110	120
14	m	4	118	21	72	102	118
15	m	4	111	26	60	93	111
16	f	5	117	22	55	77	99	107
17	f	8	126	38	74	95	107	112
18	m	4	116	40	88	107	116
19	m	4	114	19	69	96	114
20	m	3	118	60	92	118
21	f	5	118	33	65	85	108	118
22	m	6	118	38	67	85	105	113
23	m	3	108	59	90	108
24	f	5	120	37	71	92	110	120
25	m	3	115	55	89	115
26	m	6	121	44	75	94	106	114
27	m	6	116	33	68	88	107	114
28	f	5	118	33	65	85	108	118
29	f	4	108	23	57	87	108
30	f	3	113	62	93	113
31	m	6	117	41	74	91	107	113
32	m	6	118	32	69	83	105	114
33	m	3	100	46	75	100
34	f	6	115	27	59	81	100	108
35	f	3	109	48	89	109
36	m	3	116	62	97	116
37	m	4	102	30	66	90	102
38	m	3	98	50	77	98
39	m	4	115	15	58	90	115
40	f	3	105	57	84	105
41	m	3	106	46	82	106
42	f	4	114	14	55	93	114
43	f	3	100	49	81	100
44	m	3	89	61	81	89
45	f	4	100	22	62	83	100
46	m	6	111	33	68	83	99	106
47	f	4	116	15	65	98	116
48	m	6	123	31	69	93	105	118
49	f	8	125	49	74	94	106	113
50	f	3	116	57	97	116
51	f	4	114	44	78	98	114
52	m	4	113	33	76	99	113
53	m	8	129	48	78	98	109	115
54	f	6	116	33	68	83	101	109
55	f	8	132	46	76	96	108	118
56	f	8	131	29	58	87	103	113
57	m	4	125	25	63	105	125
58	m	6	129	30	66	87	110	121
59	f	3	114	57	94	114
60	m	8	121	20	44	70	90	102
61	m	3	121	52	93	121
62	m	2	90	53	90
63	f	2	88	47	88
64	f	2	63	31	63
65	m	2	84	51	84
66	m	2	75	38	75
67	m	2	77	35	77
68	m	2	84	42	84
69	m	2	67	31	67
70	m	2	76	34	76
71	m	9	122	40	74	92	102	108
72	f	9	115	35	62	78	91	96
73	f	10	125	42	77	90	102	107
74	f	10	132	27	54	85	104	116
mean				38.0811	73.5405	95.6154	108.286	113.406
At Putyatina Island, 1980
1	m	8	156	44	86	115
2	f	5	133	53	89	115	128
3	f	10	143
4	f	3	116	60	94	115
5	f	10	155
6	f	6	137	48	87	115	125	130
7	f	11	144
8	m	4	128	57	95	118	126
9	m	3	120	52	95	118
10	m	5	134		82	116	128	132
11	f	10	150		85	117	134
12	m	11	143
13	m	10	152
14	f	11	143
15	m	5	133	41	84	113	124.5	132
16	m	4	128	47	95	117	126
17	f	10	149	50	101
18	m	5	143				136	143
19	f	5	136				131.5	136
20	f	3	126			115
21	m	2	106		80
22	f	9	148		80	107	120	129
23	m	5	125.5				113.5	125.5
24	f	5	142		97	132.5	138	142
25	m	4	132			122	132
26	f	11	132
27	f	3	115.5			115.5
28	f	2	90		87.5
29	m	2	92		88.5
30	f	2	79		75
31	m	3	114			114
32	f	3	117			115.5
33	f	3	116			114
34	f	3	120			118
36	m	3	115			114.5
36	m	2	81		79
37	m	3	125			122.5
38	m	3	115			112.5
39	f	7	143			115	129
40	m	3	121			118
41	m	3	118			115.5
42	m	2	80		78
43	m	5	147			126	141	145
44	f	3	120			118.5
45	f	6	141			122	133.5	138
46	f	8	153		90	115
mean				50.2222	87.4	116.966	129.125	135.25
Rifovaya Bay, 1974
1	f	4	134				134
2	f	8	168
3	f	7	165
4	f	3	106			108
5	f	3	110			110
6	f	4	131	49	98	121.5	130
7	f	5	144					144
8	f	5	146					146
9	m	4	138				138
10	f	5	156	58	104	135	154	156
11	m	9	172
12	m	3	111			111
13	f	6	153
14	m	3	117	45	96	117
15	f	9	172
16	m	6	154	48	100	130	147	150
17	m	5	147					147
18	f	6	156
19	m	5	149					149
20	m	9	172
21	m	4	135				135
22	m	4	130	35	89	118	128
23	f	6	158
24	f	4	140	48	96	128	140
25	f	5	148					148
26	f	6	155
27	m	6	151
28	f	6	155
29	f	5	148	51	97	125	141.5	146
30	f	5	144					148
31	f	5	148					148
32	f	3	110	45	95	110
33	m	4	128				128
34	f	4	132				132
35	m	7	168
36	m	3	113	38	92	112
37	f	4	137	45	96	128	137
38	f	4	133	40	95	127	133
39	m	4	128	38	93	120	128
40	f	5	148					148
41	m	3	114	46	96	114
42	m	3	115	46	97	115
43	m	3	107	40	89	107
44	m	4	140	46	98	126	140
45	m	5	146					146
46	m	3	101	45	89	101
47	f	3	113	47	97	113
48	m	4	135				135
49	f	5	153	58	109	135	151.5	155.5
50	m	3	121
mean				45.6842	96.1053	118.705	137.176	148.577
Melkovodnaya Bay, 1980
1	m	5	131		78	106	120	128
2	m	5	145	49	90	117	135	143.5
3	f	5	139	50	85	110	126	136
4	m	3	105	27	67	102
5	f	3	101		78	94
6	f	5	150		84	115	136	146.5
7	f	4	133	38	81	116.5	133.5
8	f	5	132	49	84	109	124	130
9	m	5	140	52	92	117.5	130	138
10	m	5	141	57	96	118	134	136
11	m	4	124			106	120
12	f	5	140	52	88	117	131.5	137
13	m	3	117	44	91.5	115
14	m	6	152	38	84	109	131	144.5
15	m	5	145	50	89	120	134.5	143
16	f	5	143	49	99	117	134	139.5
17	f	6	143	37	80	102	120	134
18	m	5	144	59	91	117	134	141
19	m	3	110	35	83	106
20	m	5	142	50	88	115	129	139
21	m	8	145		81	107	125	131.5
22	f	11	143
23	m	5	141	35	96.5	121	133	137
24	m	3	104	35	76	102
25	m	6	150		90	112	127	141
26	m	8	153
27	f	6	158	32		116	134	149
28	m	9	158	32	72
29	f	8	150		78	99	118	125
30	f	8	152		94	121
31	f	10	160		73	103	122
32	f	9	148		82
33	f	7	141.5		79	95
34	f	10	155		67	95	119
35	m	8	150		81	107	124.5	134.5
36	m	7	157		82	110	141	150
37	m	10	145		70	97
38	f	6	165		95	121	140	157
39	f	8	170		80	106.5	125
40	f	7	161	43	90	118	137.5	146
41	f	6	160		94.5	123	143	154
42	f	8	160		67	95	114	127
43	f	9	162	37	74	108	126	133.5
44	f	13	160
45	f	14	171
46	m	12	160	46	86
47	f	8	158		75	110	135	143
48	m	12	157		82
49		1	32	32
50		1	35	35
51		1	39	39
52	m	3	115	25	70	101	115
53	m	3	119	33	76	108	119
54	m	3	112	31	70	99	112
55	f	3	122	30	72	106	122
56	f	3	117	31	76.5	105	117
57	f	3	112	30	78	103	112
58	f	3	115	32	75	105	115
59	m	4	133	49	93	113	126	133
60	m	4	117.5	30	72.5	105	116.5	117.5
61	m	4	115	30	73	100	114	115
mean				39.5278	81.7212	108.81	126.31	137.667
Ozero Vtoroe Bay, 1980
1	m	3	118		96	120
2	f	5	138	40	80	106	127
3	m	6	141	47	92	109	125	134
4	f	5	131	47	81	105	124
5	f	5	125	48.5	81	101	116
6	m	3	106	34	86	109
7	f	7	155.5	48	101	121	130	139
8	f	7	140	40	77	100	114.5	126
9	f	5	131	50	86	108	124
10	f	7	131	35
11	f	5	130	43	78	100	118
12	m	4	135	41.5	87.5	118	136
13	m	3	110	37	91.5	110
14	m	3	106	36	83	108
15	m	2	68	34	83
16	f	3	108	44	91	110
17	f	5	129	53	81	106	121	130
18	f	3	122	46	102	124
19	f	3	112	40	86	114
20	f	5	134	37	74	99	121	134
21	f	3	112	37	90	113
22	f	5	134	44	78	103	123.5	136
23	m	7	139		88	112
24	m	6	130	36.5	90	111
25	f	5	134	40	74	102	123.5	133
26	m	6	121	53	81.5
27	m	6	142		71.5
28	m	8	135		58	88	104	113
29	f	6	150.5	50	91	113	129	143
30	f	6	150			91	106	120
31	m	3	113	47	91	112
32	f	5	121	46	72	96	112	121
33	f	7	143		76	101
34	m	8	152	48.5	81	105
35	f	7	133	49	76	93	106	118
36	f	9	150		67	108	118
37	m	3	124	53	105	125
38	f	7	143	40	83	103	115.5	126.5
39	f	5	126		83	108	119	130
40	m	2	81	37	83
41	m	2	80	44	83
42	m	2	78	40	80
43	m	3	111	37	89	114
44	f	5	127	38.5	75	102	117.5	128
45	f	7	131.5		66.5	93	106.5	114.5
46	f	7	150		69.6	99	113
47	f	6	150.5	37	71	105	128	141
48	m	7	146	37	81	107	118	129
49	m	8	144.5	28	60	89.5	108	123.5
50	m	2	72	36	76
51	m	2	77		80
52	m	2	57		62
53	m	2	51		55
54	m	2	58	30	61
55		1	33	33
56		1	35	35
57		1	38	38
58	m	2	72	37	75
59	f	7	123	53	85	97	113
60	m	5	127	34	66.5	93	115	127
61	f	4	124	34	80	111	129
62	f	8	135.5			93	112.5	120
63	f	8	137		79	104
64	m	9	132			80	93.5	107
65	f	7	140	57			117
66	f	5	117		63	90	102.5	115
67	m	6	138	41	75	92	114	130
68	f	6
69	f	8	130
70	f	8	129	25	58	85
71	f	8	137	35	83	103.5	117	125
72	f	6	124		70	90	110	122
73	m	5	135	38	72	99	125	136
74	m	7	130		73.5	95	105	114
75	f	7	121	46	78	101	110	115
76	m	3	104
77	m	7	147	43	75	103	126	140.5
78	m	8	133.5
79	m	8	152		71.5	108	129.5	142
80	f	8	128
81	f	7	142.5			103	113.5	127.5
82	f	6	147	53	98	117	132	142
83	f	5	133	41	80	106	126	135
84	f	7	126	36.5	78	97	105	112
85	m	5	125	33	67		117	129
86	f	7	123		62	103
87	m	6	137.5		80	98	112.5	129
88	f	6	139		80	106	122.5	133
89	f	7	132.5	51	90	107	115	125
90	m	5	117		66	91	109	120
91	m	5	123	33	60	90	111	123
92	m	3	11.5		90	117
93	m	3	110		84	111
94	m	3	106	37	80	108
95	m	3	110.5		91	116
96	m	3	110.5		90	114
97	f	3	103		80	106
98	m	3	106		86	109
99	m	3	91	29	68	95
100	m	3	102	38	78.5	106
101	m	3	99		76	102
102	m	3	94	38	74	98
103	m	9	143.5		62.5	91.5	109	122.5
104	f	7	159	60	91	113	125	136.5
105	f	5	125	39	74	100	117	124
106	fm	5	159	39	72	100	120	132
108	f	3	173	41.5	85	115
109	m	3	123		80	105
110	f	6	163.5	44	75	89	102.5	114
111	m	5	130	35	71	95.5	116.5	130
112	f	6	142	60	93	120	131	136
113	m	7	137	48	86	103	114.5	124
114	m	3	104.5	35	73	109
115	f	2	82	45	86
116	m	2	82	42	86
117	f	3	107	35	76	109
118	m	3	93.5		63	95
119	f	3	118	42	93	121
120	m	6	121	42		90	102	113
121	m	7	125		83
122	m	7	135	42	83	102	116	123
123	f	5	140	47	87	112	130	138
124	m	6	134	47	88	104		127
125	m	6	127	52	85	96	110	118.5
126	m	5	137	41	75	101	122	134
127	m	7	139	55	91	105	114	124
128	m	6	116	43	77	94	112	124
129	f	3	136	47	98	116
130	f	7	125.5	46	77	97	107	115
131	m	5	138.5	47.5	86.5	115	128	138
132	f	6	151.5	53	97	113	127.5	140
133	m	5	140	50	89	109	129	136.5
134	m	3	119		91	118
135	f	6	136	37	78	95	114	125
136	m	7	141		75	103
137	m	6	128	43	83	94	109	121
138	m	5	150	50	83	113	135	144
139	m	6	151	40	89	111	129	139
140	m	6	146	47	82	108	125	138
141	m	6	146	52	84	103	125	139
142	m	6	149	45	95	116	133	143
143	f	6	131.5	42	74	92.5	110	124
144	fm	5	139	33	74		126	138
145	fm	8	142	31	69	91	113	128
146	m	5	131		79	102	120	130
147	m	6	141	51	93	113	125.5	135
148	f	6	142	47	88	106	120	132
149	f	6	140.5		75.5	100	120	133.5
150	f	3	112.5		89	114
151	f	6	133	37	80	101	119	128.5
152	f	8	145.5			108	116.5	125
153	fm	5	157	47	86	119	140	152
154	m	6	146	47	85	115	130	138
155	f	5	143	38	79	107	130	140
156	m	6	152	56	94	113	129	140
157	m	6	143		76	104	120	135
158	m	5	142	45	82	108.5	130	141
159	m	6	140	46	82	105	120	132
160	f	7	141	43	88	100	113	123
161	f	5	154		91	118	138	151
162	f	5	135	40	77		123	133
163	m	6	144	46	92	111	125	137.5
164	m	5	155	41	82	114	137	152
165	f	6	146	49	91.5	112	126	139
166	fm	5	147		90	112	136	147.5
167	m	6	150	41	79	102	125	139
168	f	5	138.5		75	105	126.5	137.5
169	m	9	134.5		80	105
170	m	6	152.5	44	87.5	112	128	140
171	m	5	150	47	84	110	132.5	145
172	m	6	152	50	92.5	112.5	130	142
173	m	5	142	56	88	113	133	138.5
174	f	6	143	41.5	78	99	118	134
175	f	6	128.5	43	80	98	112	123.5
176	f	5	139		73.5	104	123.5	137
177	f	6	142	48	92.5	111	126	134
178	f	8	136	42	67	95	114	125
179	f	6	125	34		90	107	122
180	f	6	145.5	37	80	100	119	136
181	f	6	137	51	87	105	117.5	129
182	f	6	142		69	101	116	134
183	f	7	147	44.5	87	112	123.5	132
184	f	6	139	40	79	103	119	132
185	f	8	152.5	34		110	125	132
186	f	6	123	42	76	93	105	115
187	m	7	140	30	61	88	117	129
188	m	6	148	46	86	113	128	140
189	m	6	137		81	99.5	117	130
190	f	3	113.5		85	114
191	m	2	90	45	93
192	f	8	152	47	97	110	130	135
193	m	6	145	36	79	102	121	138.5
194	m	5	149	44	85	112	129	140
195	m	5	124	31	80	102	118	126
196	f	6	129	46	74	101	112	123
197	m	6	145	45	94	111	123	135
198	m	5	137	43	82	108	128.5	136
199	f	6	148	48	91.5	103	128	141
200	f	5	135	32	70	97	122	131
201	f	6	136	43	81	100	117	130
202	f	6	147	37	80	105	125	139
203	f	5	148	40	82	114	136	146.5
204	m	6	142	32	71.5	99	118	133.5
205	f	10	150	44	77	104	129	134
206	f	5	137	37	75	102	126	133.5
207	f	6	131	40	85	105	127.5	148
208	f	2	110	30	78
209	f	10	101	30	73	106	124.5	140.5
mean				42.1053	80.6532	104.657	120.239	131.381
Lazurnaya Bay, 1980
1	f	11	132	40	77	98
2	m	9	132	39	69
3	f	6	133	60	97.5	116.5	126	132
4	m	12	134	41	80.5
5	f	11	140	36	74	97
6	f	7	144	39	81	104	121.5	133
7	f	12	135	35
8	m	12	141	33
9	m	5	131	53.5	97	120	129	131
10	f	11	138	33	69	95	113.5
11	m	4	119	54	85.5	113	121.5
12	f	5	141	68	102	119	130	138.5
13	m	9	124	31	64	80	97	111
14	m	4	124	60	99	115	123.5
15	m	4	118.5	52	90	110	120
16	m	3	101.5	39	97	99.5
17	f	5	128	48	90	117	125.5	129
18	m	11	146
19	m	4	136.5	45	92	122	134
20	f	14	133		61
21	m	5	130	44	93	118	130	132
22	f	12	134
23	f	12	137	32.5	73	96
24	f	13	130		55	83
25	m	11	130		72	98
26	m	11	135	39	81	105	115	123
27	f	11	141	34	67	95	115
28	f	12	143	33	74	104
29	f	11	144.5		72	97
30	m	10	133		67	93
31	f	10	134	36	71.5	100	111	117
32	m	4	122	49	90	114	121
33	m	5	122	57	96	118	126	128
34	f	14	150
35	m	4	128.5	56.5	99	117	128
36	f	9	122
37	m	11	127	35	68	89
38	m	8	126	36	77	99
39	f	12	136
40	f	10	134	43	80	104	121	128
mean				43.3833	80.6364	104.533	121.5	127.5
Kreiserok Bay, 1996
1	m	9	170	47	103	131	150	160
2	f	5	161	64	116	140	154	157
3	f	8	167	51	93	120	140	152
4	f	5	153	62	102	128	145	150
5	m	4	133	77	112	126	133
6	f	4	143	63	110	128	140
7	f	4	126.5	57	95	116	126
8	m	4	132	55	96	118	131
9	f	3	127.5	56	100	123
10	m	6	163	68	110	139	156	160
11	m	7	160.5	69	110	135	150	154
12	f	6	155	68	109	132	144	149
13	f	6	150.5	65	111	134	146	151
14	f	6	150	65	103	129	144	149
15	f	7	157	69	111	134	145	149
16	m	6	154.5	67	113	134	143	150
17	f	7	158.5	56	103	128	143	147
18	f	6	152	65	108	132	141	147
19	m	7	146	64	103	125	135	142
20	m	6	154	57	103	129	142	148
21	m	6	153	64	104	126	139	145
22	m	7	156	70	110	131	141	145
23	m	6	157.5	72	118	140	147	152
24	m	6	145.5	57	102	122	137	143
25	f	6	142	58	109	124	132	138
mean				62.64	106.16	128.96	141.833	149.4
Andreeva Bay, 1980
1	m	3	115	45.5	92	114
2	f	6	133.5	33	71	95.5	112.5	124
3	f	6	123	42	81.5	98.5	110	119.5
4	m	3	111	40	87.5	111
5	f	2	102	54	100
6	m	2	100.5	55	99.5
7	m	2	100	57.5	100
8	m	2	98	58	98
9	m	2	91.5	53	91.5
10	f	2	89	51.5	89
11	f	4	117	44.5	78.5	102	115
12	f	7	129	47.5	94.5	106	112	119
13	f	12	135	52.5	91	107	117
14	f	7	127		89	106	116	120
15	f	8	144
16	f	6	124	31.5	65	92.5	106.5	117
17	f	6	135	48.5	85	102	114.5	126
18	f	11	132	40	72	99	110	116
19	m	8	135	50	91.5	113.5	123.5	126.5
20	f	6	140	42	86	108	122	132
21	m	2	99	58.5	98.5
22	m	2	92	57.5	92
23	m	2	101	59.5	101
24	m	7	106
25	m	4	134	43.5	85	117.5	135
26	f	8	133	53	95.5	116	121	124
27	m	4	125.5	55	91	111.5	124.5
28	m	8	136	48	78	99	112	126.5
29	m	5	138.5	48	91	113	127.5	138
30	m	4	126	52	88.5	111	126.5
31	f	5	131	49	90	107	120.5	130
32	m	4	128.5	49	89	115.5	129
33	f	7	130.5	44	85	102	113.5	118
34	f	8	125
35	f	9	143		90	110	121	126
36	m	7	126	47	87.5	102	112	117
37	f	7	136	44	87	106.5	117.5	124.5
38	f	7	136	46	84	106	119	126.5
39	m	7	129	47.5	88	110	122	126
40	f	8	146.5	45	93	113	125.5	135
41	m	8	125	53	88	106	113	116
42	m	7	133	50	90	109	116	126
43	m	2	98	57	98
44	m	2	94.5	53.5	94
45	f	2	93	54	93
46	m	2	92	52	92
47	f	4	125	55.5	86.5	108	124
48	f	6	132	44	81	104	116	122
49	f	6	122.5	40.5	77	93	104.5	114
50	m	6	137	42.5	81	103	118	128
51	f	10	135
52	f	4	124.5	43	84	109	124
53	f	8	140.5	56	87.5	110.5	123	128
54	m	4	120.5	48	85	107.5	121.5
55	f	8	132	42.5	86	105	118
56	m	6	118	44	78
57	f	8	133		85	103
58	f	7	126	47.5	84	104	114	119
59	m	5	147	54	101	121.5	134
60	m	6	125.5		83.5
61	f	8	133	48	86	108	119	125
62	f	8	132	50	88	108	119.5
63	m	2	89	48.5	90
64	m	2	93	50	95
65	f	6	151	45	94.5	124	141	146
66	f	11	148
67	m	13	159	50	99	122	132	137
68	f	7	151	49	103	126	130	141
mean				48.6441	88.6746	107.967	119.837	125.597
Sivuchiya Bay, 1996
1	f	7	157	68	107	134	144	152
2	f	8	165	57	104	129	140	147
3	m	6	161.5	75	121	142	151	156
4	f	7	160	72	114	132	139	147
5	f	7	167	60	103	134	153	162
6	fm	5	147	51	97	125	138	150
7	m	6	162	78	121	139	148	157
8	f	7	152	67	102	119	134	142
9	m	7	163	68	104	131	145	152
10	m	7	153.5	72	114	133	140	144
11	m	5	158	68	105	131	143	157
12	f	8	164	71	113	134	141	150
13	f	6	159.5	62	107	134	147	154
14	m	5	150	70	110	134	146	153
15	f	7	163	63	107	135	149	156
16	m	8	161	69	111	132	141	153
17	f	6	164.5	74	109	132	145	154
18	f	7	164	53	99	124	143	153
19	m	5	160	65	111	138	149	161
20	f	6	148	75	113	128	136	144
21	m	7	142	79	115	128	132	136
22	m	5	154	74	109	132	142	151
23	f	5	152	55	111	133	141	149
24	m	5	161	56	108	136	148	158
25	f	4	150	62	109	132	146
26	f	5	151.5	55	101	125	137	147
27	f	7	155.5	54	100	125	138	144
28	m	8	165	73	121	139	151	157
29	m	5	151.5	59	103	126	141	148
30	f	8	163	74	100	115	133	143
31	m	7	160	58	104	128	142	150
32	f	8	170	66	110	130	146	157
33	f	6	156	54	108	131	146	152
34	m	8	167	65	115	141	152	157
mean				65.3529	108.412	131.206	143.147	151.303
Vityaz Bay, 1979
1	f	8	172	52	90	125	145	157
2	f	13	163		85	105
3	m	9	158	56	97	122	133	140.5
4	f	9	153		80		128
5	m	9	157	40	80	110	128	137.5
6	f	7	159	46	95	123	139	150
7	f	5	142	38	89	120	135	142
8	f	9	161	50	89	119	132	142
9	f	8	153		100	124	136	143
10	m	7	148	45	89		124	134
11	m	7	151		92	118.5	129.5	137
12	m	8	161	50	94	118.5	137
13	m	8	140	51	89	110	121	130
14	f	11	152	59	96	117
15	f	8	153	57	98
16	fm	11	169		98
17	f	9	148	46	89	117.5	129	138
18	m	6	148	43	87	118	133	143
19	f	7	147	45	90	117	130	137.5
20	m	6	142	45	89	115	129	138.5
21	m	8	144	45	88	111	123
22	f	8	156		95	125	141	151
23	m	6	136	47	84	111	123	130
24	m	5	138	39	90	115	131	136
25	m	10	158	51	94
26	f	6	138	53	92	113	124.5	133.5
27	m	8	141	30	73	105	120
28	m	7	144	40	84	108	126	134
29	m	7	139	40	89	112.5	126.5	133.5
30	f	6	150	33	76	108	126.5	141
31	f	4	129	56	97	117	129
32	f	9	157	65	94	115	128	136
33	m	8	153		84	114	132
34	m	8	152		75	110	126
35	f	11	150	51	89
36	m	9	161		86	115	133	143
37	f	12	165		88	121	136
38	f	10	159	46	90	116	133	143
39	f	11	160	51	93	122	139	147
40	m	12	167	47	94	121	134	143
41	f	12	162		99	125
mean				47.2333	89.5122	116.114	130.588	140.038
At Stenina Island, 1979
1	m	13	190				138	154
2	f	13	173
3	f	15	171		87
4	m	12	178		87	117
5	m	9	172		84	117	138.5	155
6	m	7	170	52	91	122	138.5
7	f	11	159		92	120	134	143
8	f	9	155	38	80	106	119	133
9	fm	15	180	47	93	122	139	150
10	m	8	167	47	93	122	139	150
11	f	12	173		98	129	142	152
12	f	13	173		79	115	139	152
13	m	7	154	41	90	119	134	143
14	f	12	181		83	124	145
15	m	8	167		82	115	137.5	153.5
16	f	9	163	44	84	116	137	152
17	f	9	169		82	114	134	147
18	f	11	166		85	118	136
19	m	10	166	44	98	122	138
20	f	6	165	45	99	131	149	160
21	m	5	157	46	76	105	123	138
22	f	5	137	46	95	124	137
23	m	16	175
24	m	12	171	40	91	115	133	144
25	f	12	171		95	126
26	m	8	170			131	147
27	f	12	181		93	124	144	152
28	m	10	170		91	122
29	m	9	188		91	128	152	164
30	f	10	178	45	96	122	140
31	m	9	183	50	99	127	149	164
mean				45	89.4074	120.481	138.5	150.361
Severnaya Bay, 1999
1	f	11	164	57	97	111	128	138
2	m	11	165		106	121	132	141
3	f	11	149	56	92	107	119	127
4	m	11	165	52	95	119	130	137
5	m	12	150	53	99	116	121	127
6	f	11	171	70	110	120	138	149
7	f	11	160	60	99	115	126	132
8	m	11	155	42	88	116	126	135
9	f	9	168	61	105	128	142	150
10	f	12	156	53	101	114	124	132
11	m	11	158	54	94	111	126	136
12	f	11	174	52	102	118	139	146
13	m	11	170	53	94	115	128	139
14	f	11	155	52	92	112	129	136
15	m	3	129	44	96	129
16	m	11	166	55	95	118	132	142
17	f	11	159		94	118	124	133
18	f	9	157	50	88	113	129	139
19	f	12	160
20	f	12	162
21	m	11	155	49	92	108	123	130
22	f	11	171	54	101	128	140	150
23	f	10	163	50	93	122	132	139
24	m	11	150	50	90	114	125	132
25	f	11	163	51	92	114	127	133
26	m	11	166	50	93	113	125	133
27	f	10	158	52	97	115	125	133
28	m	10	160	50	95	116	130	137
29	m	9	170	56	95	122	139	150
30	f	11	155	60	100	112	118	126
31	m	11	177	65	110	128	137	145
32	f	8	162	55	104	120	136	149
33	f	14	156	42	76	98	115	120
34	m	11	162	57	98	116	125	134
35	f	11	158	42	81	111	126	134
36	f	9	169	51	100	124	138	152
37	m	11	161	63	96	111	128	140
38	f	11	169	62	93	116	130	140
39	m	10	166	64	106	110	135	144
40	m	11	167	55	102	118	132	143
41	f	9	147	43	81	106	120	130
42	m	11	143	49	90	108	118	124
43	f	11	158	52	97	110	118	130
44	m	11	159	61	100	118	125	132
45	m	10	150	59	97	113	120	126
46	f	11	169	59	94	113	138	145
47	m	11	168	52	95	123	137	145
48	f	11	172	50	100	120	138	147
49	f	13	165	50	98	118	126	133
50	f	11	163	63	103	117	129	135
51	m	11	171	53	100	120	136	146
52	f	4	130	46	82	110	127
53	f	9	159		88	117	133	145
54	m	11	156	59	94	114	126	134
55	m	5	152	58	94	122	140	149
56	m	10	170	57	103	134	146	152
57	f	10	154	56	98	115	126	133
58	f	12	175	37	87	122	133	145
59	m	10	162	61	100	116	135	147
60	m	9	156	50	80	100	120	131
61	f	5	129.5	41	79	100	118	130
62	m	5	139	53	90	111	128	140
63	m	9	158.5	53	92	115	130	143
64	f	9	154	50	94	120	136	143
65	f	5	132	39	85	109	122	133
66	m	5	134	35	79	102	122	133
67	f	11	162.5	58	96	119	136	145
68	m	8	165.5	51	100	125	141	152
69	f	11	159	58	95	111	129	141
70	f	11	152				128	142
71	f	5	131	64	94	118	128	132
72	f	5	130	38	81	100	118	128
73	m	5	134	44	83	110	128	136
74	m	12	163	55	97	117	136	148
75	m	5	134	54	92	112	128	136
76	m	11	158	50	90	108	120	130
77	f	9	172	61	97	127	142	157
78	m	5	129	36	85	109	123	130
79	f	10	161.5	56	97	123	134	142
80	f	10	153	52	91	118	130	140
81	m	9	155	54	95	117	131	139
82	f	11	164	57	102	122	137	146
83	m	10	164	45	85	118	134	147
84	f	10	165	50	92	112	130	143
85	f	12	161	53	85	105	120	130
86	f	11	157				129	143
86	m	11	154	55	96	119	134	137
88	m	9	147	60	98	115	129	135
89	m	10	158		98		137	140
90	f	8	151	55	91	122	135	142
91	f	8	161	54	106	134	147	155
92	m	10	151	56	102	117	132	135
93	fm	9	154			122	134	140
94	f	10	165	53	99	124	136	148
95	m	10	159	56	106	129	140	145
96	m	5	130	44	87	106	124	132
97	m	9	173			138	153	158
98	f	10	154			123	131	138
99	f	5	130	45	87	109	125	132
100	f	9	161	56	89	121	134	142
101	f	10	150				124	134
102	m	5	129	45	90	114	127	134
mean				52.7	94.3298	116.188	130	138.857
